# Supplementary material
Source: PubMed Central journal article supplement (PMC4753677)

**Supplementary Figure 1:** One of 31 equally parsimonious trees of 8,488 SNP data set derived from RADseq in the radiating *Diospyros* group from New Caledonia. Numbers on branches indicate bootstrap support over 50%. Branches in bold are present in the strict consensus of the 31 trees. For improved visibility, each species was randomly coloured differently.

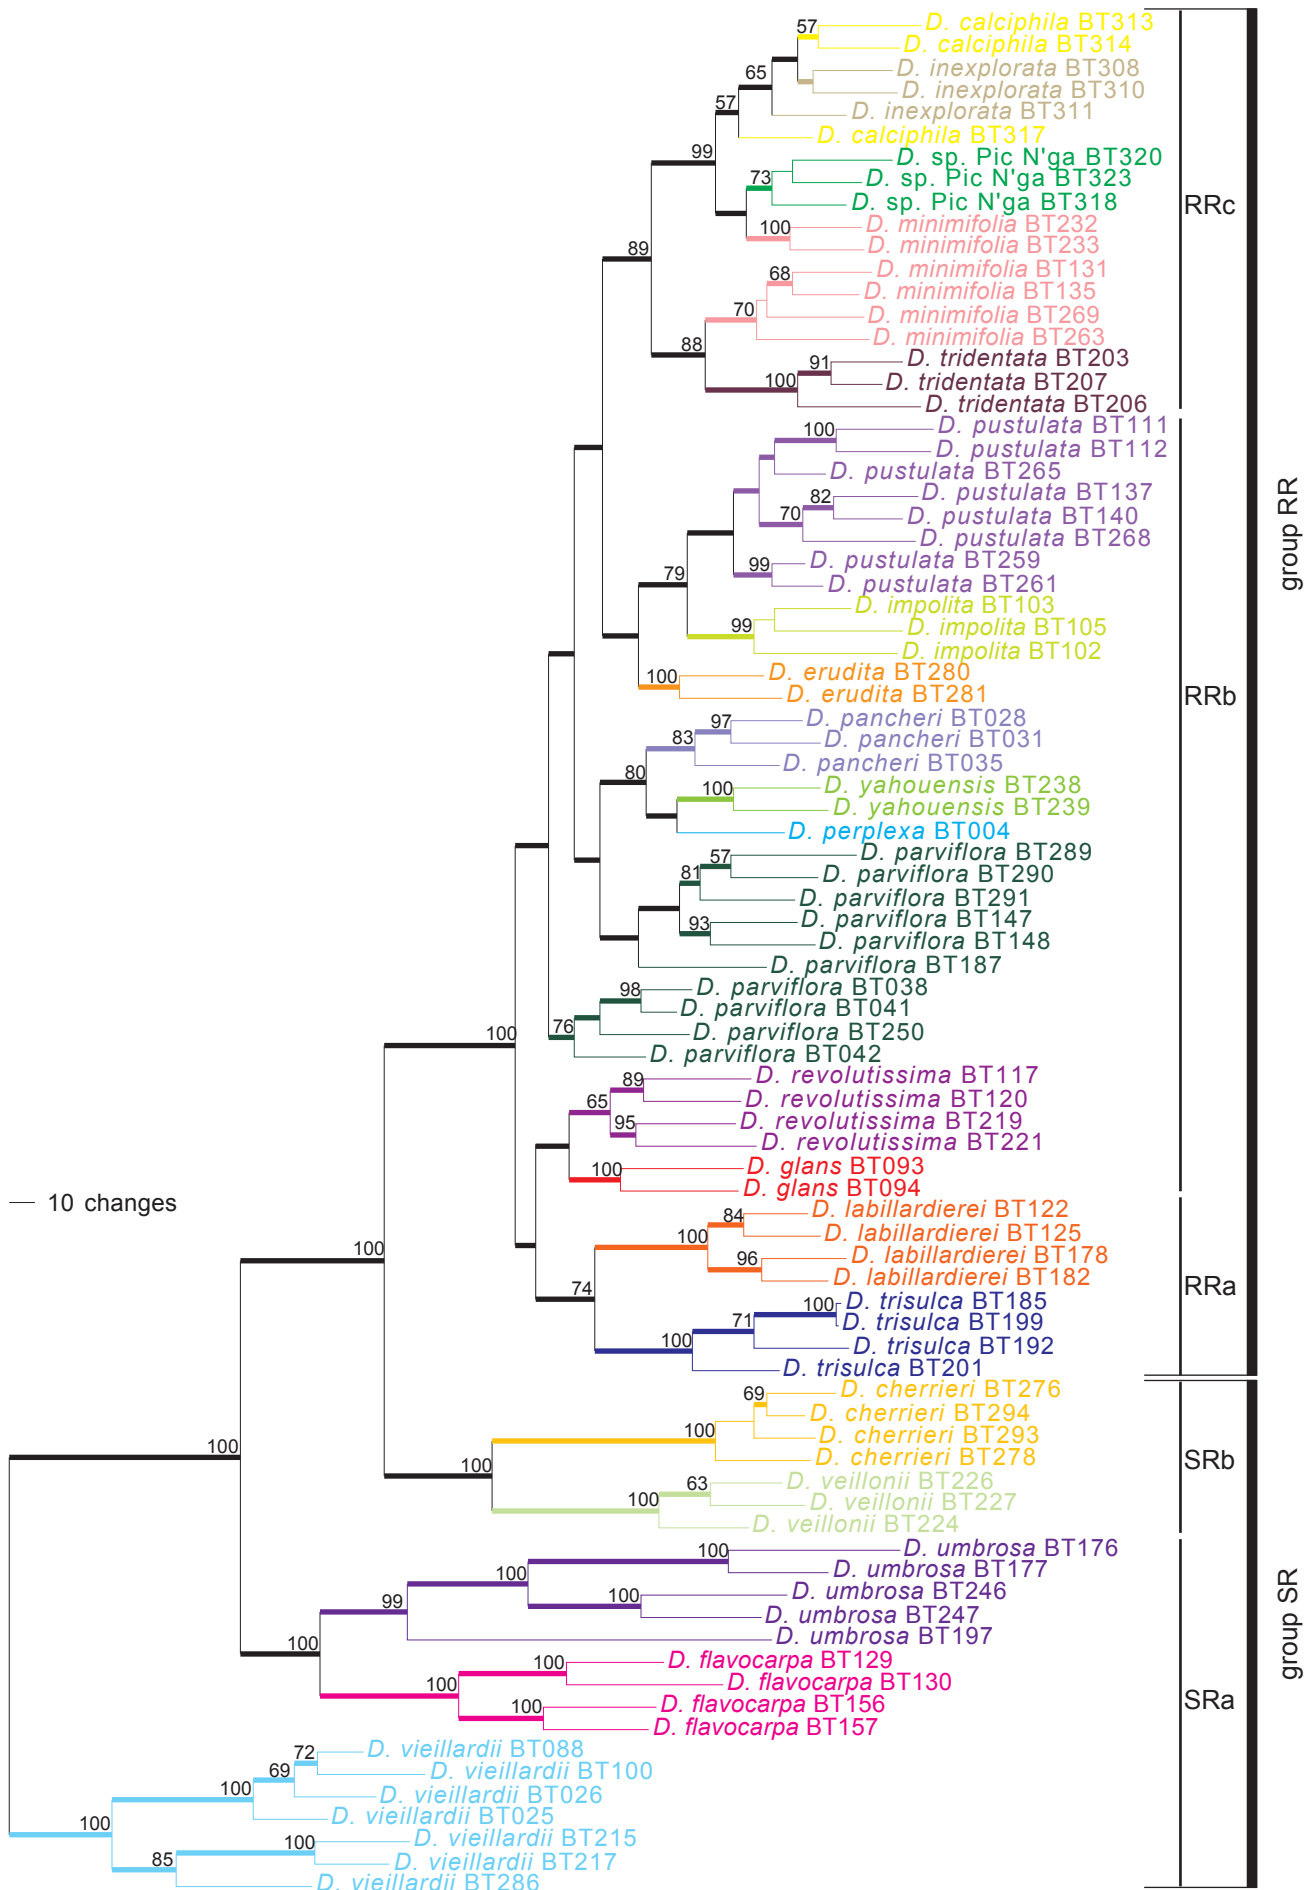

Supplement: NIHMS66300-supplement-SupplFig__1.pdf [file NIHMS66300-supplement-SupplFig__1.pdf]
