# Supplementary material
Source: PubMed Central journal article supplement (PMC4753677)

**Supplementary Figure 3:** Structure results in detail. Abbreviations: L: location; refers to location number given in Fig. 1 and Table 1.

a) Clustering of all individuals according to  $K = 2$ , as indicated by the  $\Delta K$  statistic shown at c).

b) Clustering of the group G2 for  $K = 3$ , as indicated by the  $\Delta K$  statistic shown at d).

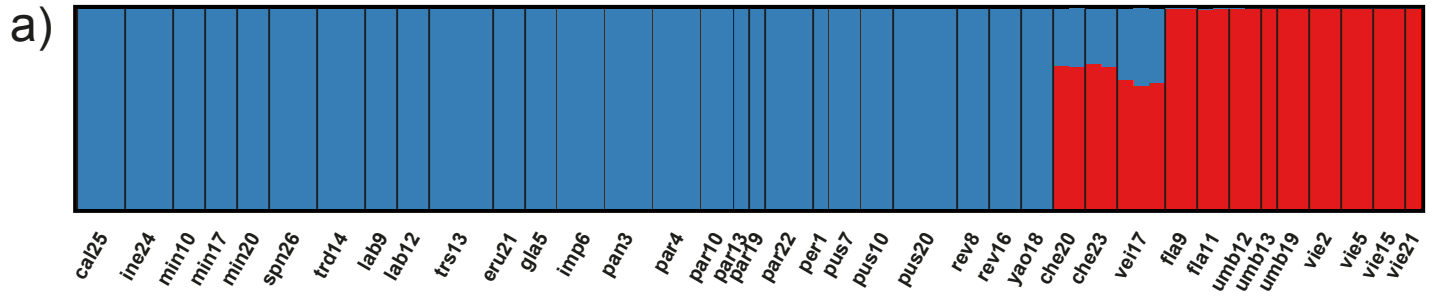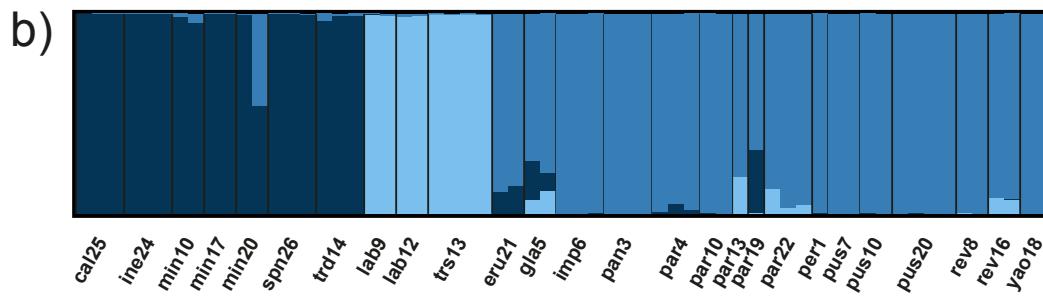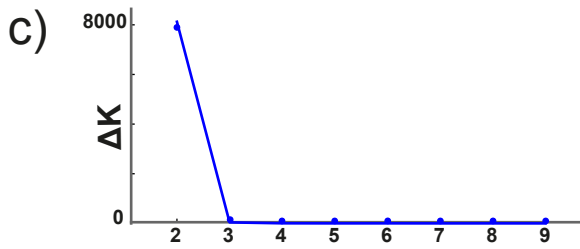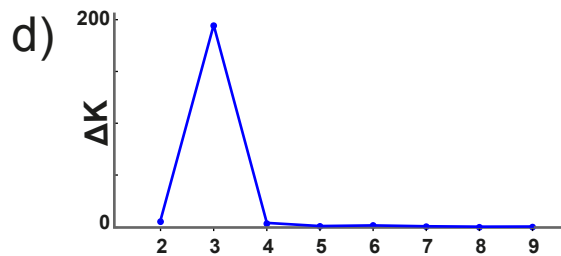

Supplement: NIHMS66300-supplement-SupplFig__3.pdf [file NIHMS66300-supplement-SupplFig__3.pdf]
