# Supplementary material
Source: PubMed Central journal article supplement (PMC4753677)

**Supplementary Figure 4:** Relationships depicted with Treemix, including introgression events between the sampled *Diospyros* individuals from localities represented by two or more individuals in the present dataset.

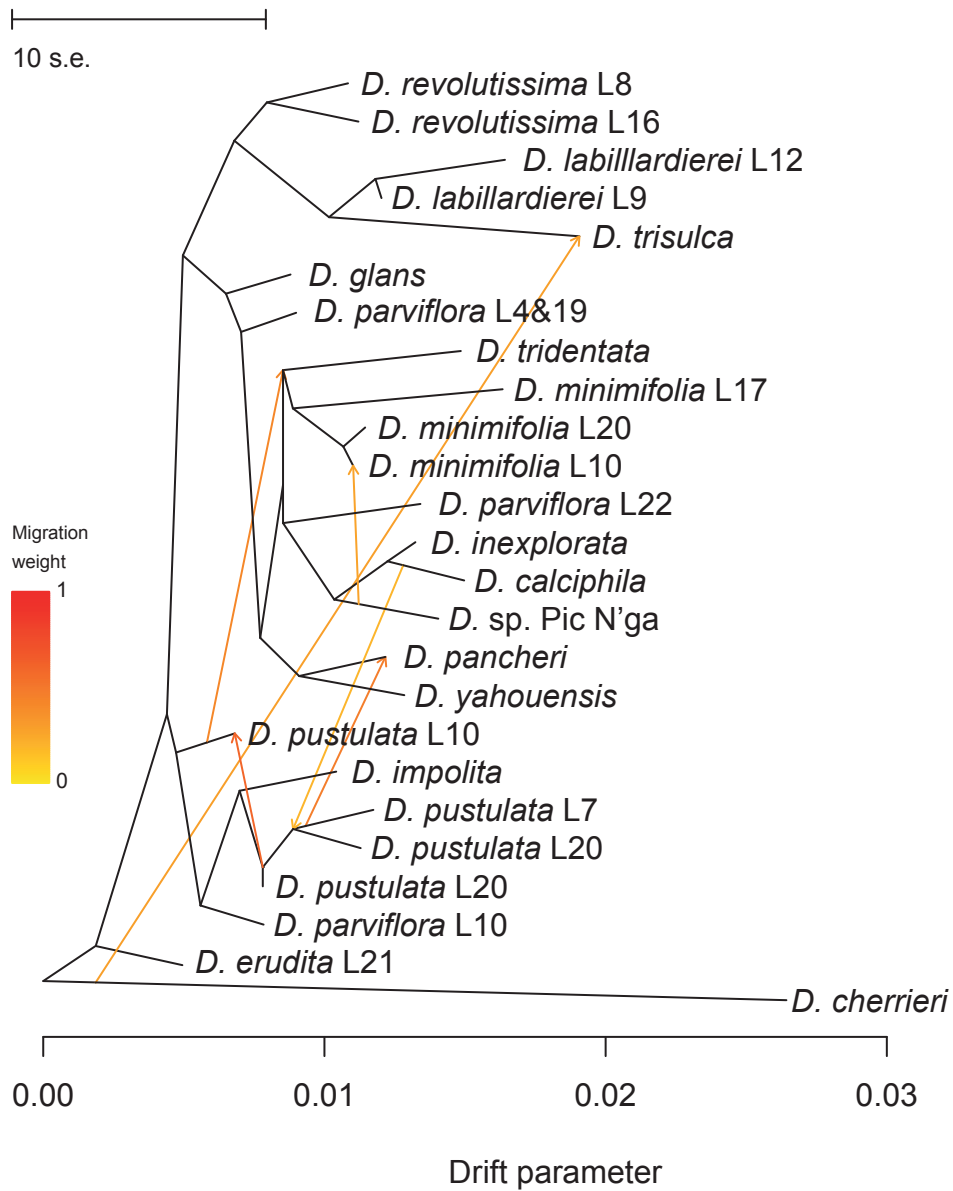

Supplement: NIHMS66300-supplement-SupplFig__4.pdf [file NIHMS66300-supplement-SupplFig__4.pdf]
