# Supplementary material
Source: PubMed Central journal article supplement (PMC4753677)

**Supplementary Figure 5:** Maximum-likelihood reconstruction of habitat evolution for a) climate type and, respectively, b) soil preference. Ancestral conditions are shown at the nodes; current conditions are shown at the tips. Internal nodes without boxes/circles indicate no change in ancestral conditions.

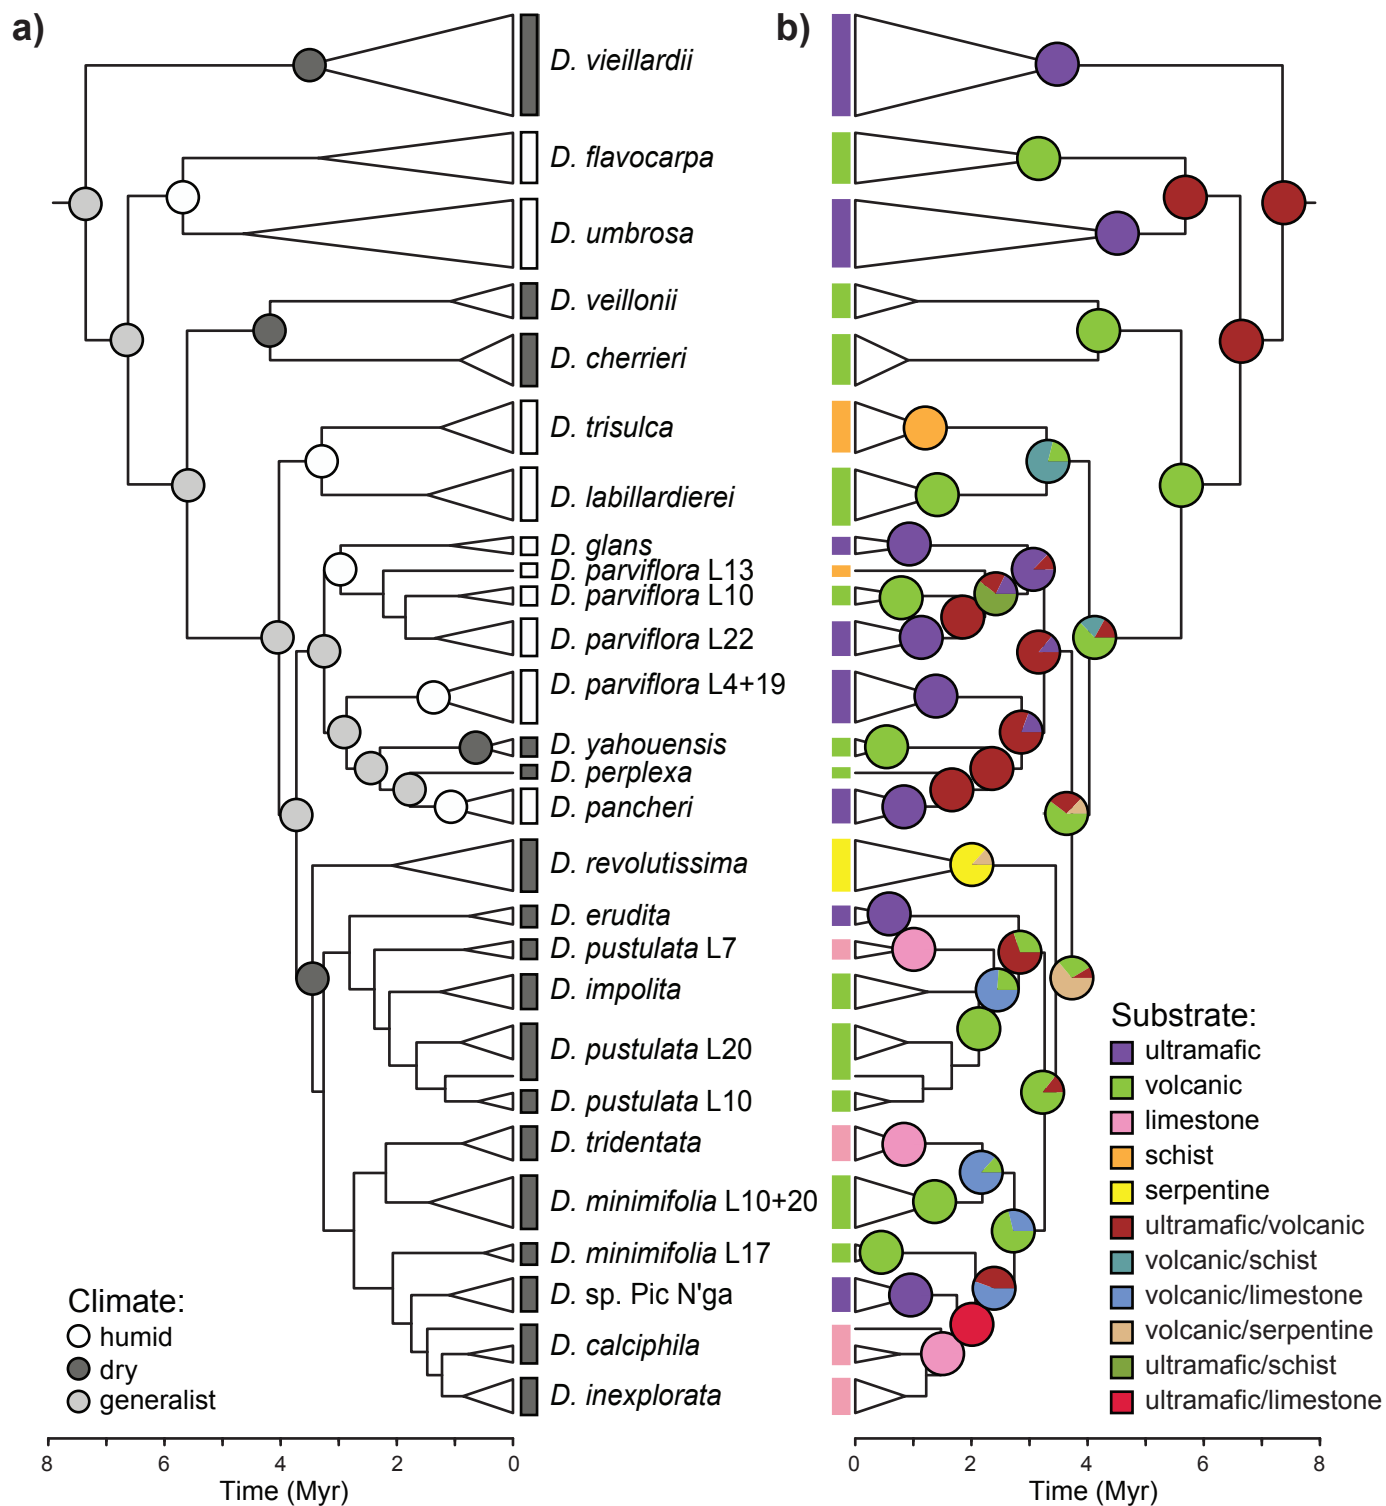

Supplement: NIHMS66300-supplement-SupplFig__5.pdf [file NIHMS66300-supplement-SupplFig__5.pdf]
