# Supplementary material
Source: PubMed Central journal article supplement (PMC4753677)

**Supplementary Figure 6:** Blast2Go-derived combined graphs for the 26 annotated genomic regions hypothesized to be recurrently involved in divergent edaphic adaptation. Only categories with a node score  $\geq 2.00$  are shown. a) Most important GO biological processes, and b) the GO categories of molecular functions of those genomic regions. Nodes are coloured by node score (i.e., relevance).

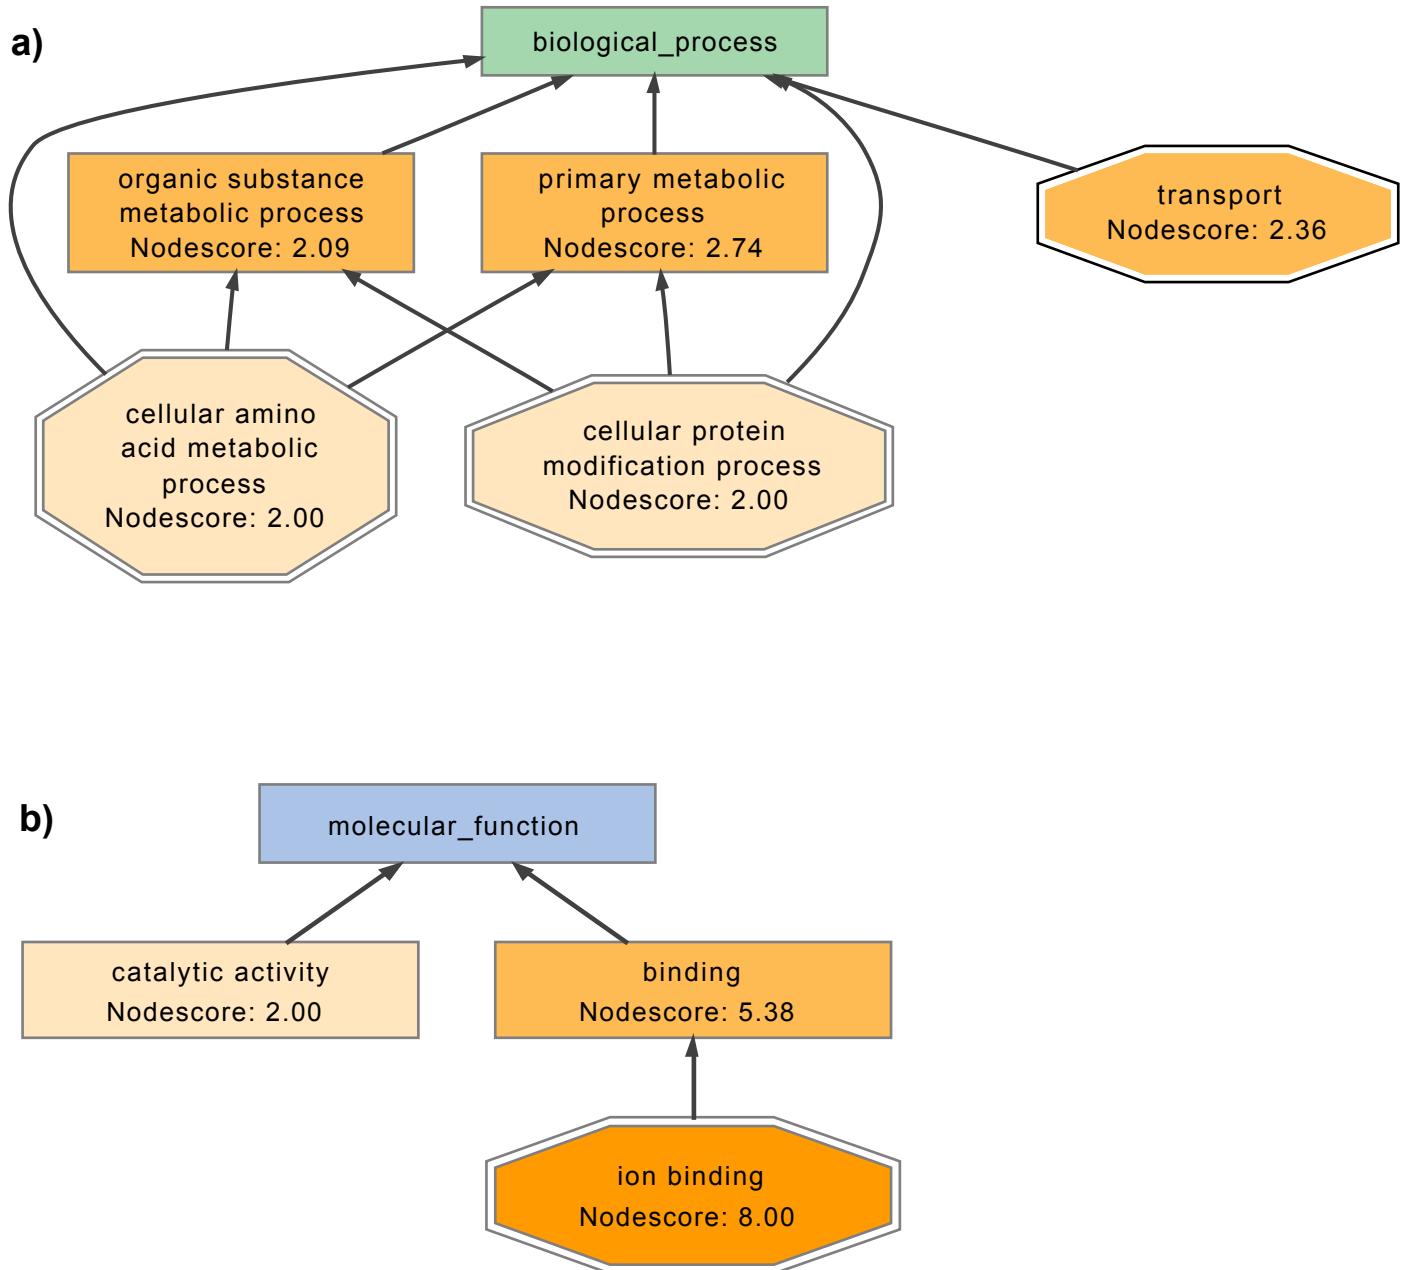

Supplement: NIHMS66300-supplement-SupplFig__6.pdf [file NIHMS66300-supplement-SupplFig__6.pdf]
