# Supplementary material
Source: PubMed Central journal article supplement (PMC4753677)
Supplement: NIHMS66300-supplement-SupplTable_1.pdf [file NIHMS66300-supplement-SupplTable_1.pdf]

**Supplementary Table 1.** The number of stacks obtained with STACKS by varying the value of the minimum number of identical reads required for a stack (m), the number of nucleotides different between loci when processing one individual (M), and when building the catalogues (n).

| Settings<br>(m, M, n) | Total stacks | Stacks present<br>in at least 2 inds | Stacks with 1-10 SNPs,<br>covered in at least 70 inds | Stacks with<br>over 11 SNPs |
|-----------------------|--------------|--------------------------------------|-------------------------------------------------------|-----------------------------|
| 5, 1, 1               | 2,377,725    | 163,982                              | 1,066                                                 | 1,024                       |
| 7, 1, 1               | 1,308,369    | 92,923                               | 1,622                                                 | 1,130                       |
| 9, 1, 1               | 830,081      | 62,560                               | 1,711                                                 | 1,117                       |
| 10, 1, 1              | 674,766      | 53,443                               | 1,722                                                 | 1,111                       |
| 11, 1, 1              | 552,461      | 46,326                               | 1,723                                                 | 1,114                       |
| 12, 1, 1              | 455,927      | 41,211                               | 1,720                                                 | 1,103                       |
| 13, 1, 1              | 379,550      | 37,336                               | 1,725                                                 | 1,093                       |
| 14, 1, 1              | 320,107      | 34,291                               | 1,719                                                 | 1,096                       |
| 15, 1, 1              | 272,903      | 31,905                               | 1,719                                                 | 1,088                       |
| 13, 2, 1              | 371,779      | 35,652                               | 1,479                                                 | 1,347                       |
| 13, 3, 1              | 366,112      | 34,978                               | 1,388                                                 | 1,431                       |
| 13, 1, 0              | 411,564      | 44,390                               | 1,553                                                 | 112                         |
| 13, 1, 2              | 364,437      | 35,505                               | 1,227                                                 | 1,765                       |
| 11, 1, 2              | 532,568      | 45,475                               | 1,174                                                 | 1,836                       |
